# Supplementary material
Source: PubMed Central journal article supplement (PMC3530874)
Supplement: 97320630081211S1.pdf [file 97320630081211S1.pdf]

## Supplementary material:

**Table 1:** Identification of selected ESTs of each gene family by standalone BLAST

| EST IDs                                                     | No. of selected ESTs after BLAST analysis | EST IDs        | No. of selected ESTs after BLAST analysis |
|-------------------------------------------------------------|-------------------------------------------|----------------|-------------------------------------------|
| <b>17.3 KDa class II heat shock protein (Hsp17.3)</b>       |                                           |                |                                           |
| gi   107954700                                              | 2                                         | gi   108954720 | 113                                       |
| gi   108954815                                              | 4                                         | gi   108955108 | 147                                       |
| gi   108955133                                              | 15                                        | gi   108955061 | 148                                       |
| gi   108954762                                              | 30                                        | gi   108954987 | 367                                       |
| <b>Desiccation protective protein LEA5</b>                  |                                           |                |                                           |
| gi   108954782                                              | 36                                        | gi   108954830 | 84                                        |
| gi   108954989                                              | 82                                        | gi   108954970 | 84                                        |
| <b>DnaJ heat shock N-terminal domain containing protein</b> |                                           |                |                                           |
| gi   108954994                                              | 17                                        |                |                                           |
| <b>Hsp70-60 KDachaperonin</b>                               |                                           |                |                                           |
| gi   108954655                                              | 22                                        | gi   108955170 | 22                                        |
| gi   108955006                                              | 22                                        |                |                                           |
| <b>Type 2 metallothionein</b>                               |                                           |                |                                           |
| gi   108955024                                              | 126                                       | gi   108954648 | 500                                       |
| gi   108955082                                              | 126                                       | gi   108954669 | 500                                       |
| gi   108955151                                              | 126                                       | gi   108955131 | 500                                       |

**Table 2:** Selection of putative candidate genes with the help of TAIR and WISE2 result

| Family Name                       | Assembled Contigs       | TAIR Result                                  | E-Value            | Description                                                                   | WISE2 Result                                             | WISE2 Score (in bits) |               |
|-----------------------------------|-------------------------|----------------------------------------------|--------------------|-------------------------------------------------------------------------------|----------------------------------------------------------|-----------------------|---------------|
| 17KDa Class II Heat Shock Protein | 108954762               | <i>Arabidopsis</i><br>Gene Id<br>AT5G12030.1 | 5.00E-04           | At-Heat Shock Protein<br>17.6 Kda                                             | Exon position<br>96-554                                  | 215.62                |               |
|                                   | 108954815               | AT5G37670.1                                  | 2.00E-08           | HSP20-like chaperones<br>superfamily protein                                  | 55-489                                                   | 213.46                |               |
|                                   | <b>108955061</b>        | <b>AT2G29500.1</b>                           | <b>7.00E-25</b>    | <b>HSP20-like chaperones<br/>superfamily protein</b>                          | <b>238-687</b>                                           | <b>283.27</b>         |               |
|                                   |                         | AT3G46230.1                                  | 2.00E-21           | At Heat Shock Protein<br>17.4 Kda                                             | 238-687                                                  | 266.81                |               |
|                                   | <b>108955108</b>        | <b>AT2G29500.1</b>                           | <b>7.00E-25</b>    | <b>HSP20-like chaperones<br/>superfamily protein</b>                          | <b>238-687</b>                                           | <b>283.27</b>         |               |
|                                   |                         | AT3G46230.1                                  | 2.00E-21           | At-Heat Shock Protein<br>17.4 Kda                                             | 238-687                                                  | 266.81                |               |
|                                   | DnaJ heat shock protein | <b>108954994</b>                             | <b>AT5G01390.4</b> | <b>1.00E-23</b>                                                               | <b>DnaJ heat shock family<br/>protein</b>                | <b>205-1023</b>       | <b>409.42</b> |
|                                   |                         | <b>108954648</b>                             | <b>AT3G09390.1</b> | <b>7.00E-09</b>                                                               | <b>At Metallothionein-1</b>                              | <b>115-354</b>        | <b>146.79</b> |
|                                   |                         |                                              | AT5G02380.1        | 0.096                                                                         | Cysteine-rich protein<br>with copper-binding<br>activity | 115-354               | 130.76        |
|                                   | Type 2 Metallothionein  | <b>108954669</b>                             | <b>AT3G09390.1</b> | <b>7.00E-09</b>                                                               | <b>At Metallothionein-1</b>                              | <b>115-354</b>        | <b>146.79</b> |
|                                   |                         | AT5G02380.1                                  | 0.096              | Cysteine-rich protein<br>with copper-binding<br>activity                      | 115-354                                                  | 130.76                |               |
| 108955024                         |                         | AT3G15353.1                                  | 1.00E-06           | Metallothionein, binds to<br>and detoxifies excess<br>copper and other metals | 72-266                                                   | 89.56                 |               |
| 108955082                         |                         | AT3G15353.1                                  | 1.00E-06           | Metallothionein, binds to<br>and detoxifies excess<br>copper and other metals | 72-266                                                   | 89.56                 |               |
| <b>108955131</b>                  |                         | <b>AT3G09390.1</b>                           | <b>7.00E-09</b>    | <b>At Metallothionein-1</b>                                                   | <b>115-354</b>                                           | <b>146.79</b>         |               |
|                                   |                         | AT5G02380.1                                  | 0.096              | Cysteine-rich protein<br>with copper-binding<br>activity                      | 115-354                                                  | 130.76                |               |
|                                   | 108955151               | AT3G15353.1                                  | 1.00E-06           | Metallothionein, binds to<br>and detoxifies excess<br>copper and other metals | 72-266                                                   | 89.56                 |               |

**Table 3:** Best predicted model with their C-Score, TM Score and RMSD value where C-Score is the confidence score for the predicted model, TM-score is a measure of global structural similarity between query and template protein and Root Mean Square Deviation is the RMSD between residues that are structurally aligned by TM-align.

| Best predicted model     |         |             |             |
|--------------------------|---------|-------------|-------------|
| Best Model               | C-Score | TM Score    | RMSD        |
| HSP best Model 1         | 0.3     | 0.75 ± 0.10 | 4.2 ± 2.8Å  |
| DnaJ best Model 1        | -3.18   | 0.36 ± 0.12 | 14.2 ± 3.8Å |
| Type 2 metallothionein 1 | -2.98   | 0.38 ± 0.13 | 10.0 ± 4.6Å |

**Table 4:** Identified best two structural analogs in PDB where Coverage represents the coverage of global structural alignment and is equal to the number of structurally aligned residues divided by length of the query protein.

| Top 2 Identified structural analogs in PDB |         |          |      |          |
|--------------------------------------------|---------|----------|------|----------|
| Gene Family                                | PDB Hit | TM-score | RMSD | Coverage |
| HSP                                        | 1gmeA   | 0.864    | 1.47 | 0.908    |
|                                            | 2byuI   | 0.613    | 0.54 | 0.621    |
| DnaJ                                       | 1nltA   | 0.62     | 1.7  | 0.651    |
|                                            | 3agzA   | 0.484    | 2.78 | 0.549    |
| Type 2 metallothionein                     | 1sj8A   | 0.486    | 3.97 | 0.914    |
|                                            | 2o8rA   | 0.467    | 3.78 | 0.864    |

**Table 5:** Best template protein for similar binding sites.

| Template proteins with similar binding site |                      |         |          |      |          |             |
|---------------------------------------------|----------------------|---------|----------|------|----------|-------------|
| Gene Family                                 | Cscore <sup>LB</sup> | PDB Hit | TM-score | RMSD | BS-score | Ligand Name |
| HSP                                         | 0.04                 | 3l1e0   | 0.493    | 2.79 | 1.03     | PEPTIDE     |
| DnaJ                                        | 0.18                 | 3agyB   | 0.461    | 2.73 | 1.52     | PEPTIDE     |
| Type 2 metallothionein                      | 0.01                 | 3hkeB   | 0.459    | 4.07 | 0.57     | T13         |
